# Supplementary material for: The CCR4-NOT Complex Mediates Deadenylation and Degradation of Stem Cell mRNAs and Promotes Planarian Stem Cell Differentiation
Source: PubMed Central journal article supplement (PMC3868585; doi:10.1371/journal.pgen.1004003), 2013-12-19
Supplement: pgen.1004003.s007.pdf [file pgen.1004003.s007.pdf]

| name       | yeast        | <i>Drosophila</i> | Human            | <i>S. mediterranea</i>     | Contig Smed genome         | Transcriptome<br>Blythe et al. | Transcriptome Adamidi et al. |               | <i>D. japonica</i> |
|------------|--------------|-------------------|------------------|----------------------------|----------------------------|--------------------------------|------------------------------|---------------|--------------------|
|            |              |                   |                  |                            |                            |                                | de novo                      | cufflinks     |                    |
| not1       | not1p/cdc39  | not1              | cnot1            | <b><i>Smed-not1</i></b>    | v31.001778 -<br>v31.002774 | AAA.454ESTABI.5886             | isotig18455                  | CUFF.103538.1 |                    |
|            |              |                   |                  |                            |                            | AAA.454ESTABI.12472            |                              | CUFF.103540.1 |                    |
|            |              |                   |                  |                            |                            | AAA.454ESTABI.16328            |                              | CUFF.132059.1 |                    |
| not2       | not2p/cdc36  | regena            | cnot2            | <b><i>Smed-not2</i></b>    | v31.001686                 | AAA.454ESTABI.4207             | isotig16723                  |               |                    |
| not3       | not3p        | lethal (2) NC136  | cnot3            | <b><i>Smed-not3</i></b>    | v31.007408                 | AAA.454ESTABI.5320             | isotig24950                  |               |                    |
|            |              |                   |                  |                            |                            | AAA.454ESTABI.23309            |                              |               |                    |
| not4       | not4p/mot2p  | CG31716           | cnot4            | <b><i>Smed-not4</i></b>    | v31.000299                 | AAA.454ESTABI.23903            | isotig13247                  |               |                    |
|            |              |                   |                  |                            |                            | AAA.454ESTABI.23904            | isotig13248                  |               |                    |
| not5       | not5p        | -                 | -                | -                          | -                          | -                              | -                            |               |                    |
| not6/ccr4  | ccr4p/fun27p | twin              | cnot6-<br>cnot6L | <b><i>Smed-not6</i></b>    | v31.000014                 | AAA.454ESTABI.14907            | isotig12027                  |               | GU305868           |
|            |              |                   |                  |                            |                            | AAA.454ESTABI.19158            |                              |               |                    |
|            |              |                   |                  |                            |                            | AAA.454ESTABI.15937            |                              |               |                    |
| not7/caf1  | caf1p/pop2p  | pop2              | cnot7-cnot8      | <b><i>Smed-not7A</i></b>   | v31.01247                  | AAA.454ESTABI.9392             | isotig01978                  |               | GU305869           |
|            |              |                   |                  |                            |                            | AAA.454ESTABI.7911             |                              |               |                    |
|            |              |                   |                  | <b><i>Smed-not7B</i></b>   | v31.000784                 | AAA.454ESTABI.8927             | isotig23596                  |               |                    |
|            |              |                   |                  | <b><i>Smed-not7C.1</i></b> | v31.002031                 | -                              | -                            |               |                    |
|            |              |                   |                  | <b><i>Smed-not7C.2</i></b> | v31.003641                 | -                              | -                            |               |                    |
| not9/caf40 | caf40p       | CG14213           | rqed1/cnot9      | <b><i>Smed-not9</i></b>    | v31.001835                 | AAA.454ESTABI.21764            | isotig03690                  |               |                    |
| not10      | -            | CG18616           | cnot10           | <b><i>Smed-not10</i></b>   | v31.000046                 | AAA.454ESTABI.10330            | isotig14445                  |               |                    |
